# Supplementary material for: Supporting self-regulated-learning in colonoscopy training—A comparison cohort trial
Source: PubMed Central journal article supplement — Heliyon. 2024 Mar 16;10(7):e28133. doi: 10.1016/j.heliyon.2024.e28133 (PMC10979054; doi:10.1016/j.heliyon.2024.e28133), 2024-03-16
Supplement: mmc1.pdf [file mmc1.pdf]

# Spørgeskemaundersøgelse Koloskopiprojekt

Kære deltager i koloskopiprojektet

Vil du venligst udfylde spørgeskemaet, tak.

Med venlig hilsen

Claudia Jaensch

---

Velkommen til spørgeskemaundersøgelsen om projektet Self-Regulated Learning i koloskopien. Du får tilsendt dette spørgeskema, fordi du har gennemført de første 4 uger af projektet. Du vil få tilsendt et spørgeskema mere efter follow up om 6 måneder. På forhånd tak fordi du tager dig de cirka 10 minutter det tager til at besvare alle spørgsmålene.

---

lægenummer

- 1
- 2
- 3
- 4
- 5
- 6
- 7
- 8
- 9
- 11
- 12
- 13
- 14
- 15
- 16
- 17
- 21
- 22
- 23
- 31
- 32

---

ny lægeid

\_\_\_\_\_

---

1. Dato

\_\_\_\_\_

(Dato for udfyldelse af denne survey.)

---

2. Hvad er din fødselsdag?

\_\_\_\_\_

---

3. Hvor langt er du i uddannelsen?

- uklassificeret
- introlæge
- HU-læge
- speciallæge
- andet

---

3.1 Andet? Hvad?

\_\_\_\_\_

---

4. Hvilket speciale er du ansat i?

- kirurgi  
 gastroenterologi  
 andet
- 

4.1 Andet? Hvad?

---

5. Hvor mange koloskopier har du lavet i alt indtil nu?

(Tæl også alle undersøgelser med hvor du har lavet det meste selv og en supervisor har lavet mindre dele af undersøgelsen.)

---

6. På hvilket sygehus er du ansat?

- Herning  
 Randers  
 Viborg  
 Horsens  
 andet
- 

6.1 Hvor arbejder du?

---

7. Hvordan har det været at deltage i dette studie?

---

8. Hvad synes du om den koloskopioplæring du modtog i din afdeling?  
Den oplæring jeg har fået har været:

- Meget godt  
 Godt  
 Tilstrækkeligt  
 Mangelfuldt  
 Særdeles mangelfuldt  
(Dit svar behandles fortroligt!)
- 

8.1 Har der været behov for at bruge noget af din fritid på koloskopioplæring?  
Hvis du tænker på de seneste 4 uger, hvor mange timer af din fritid har du gennemsnitlig brugt om ugen på oplæring i koloskopi? (diskussioner med venner/kolleger, research på nettet eller i bøger, videoer om koloskopi mv)

(skriv timetallet med én decimal: f.e. 0,5)

---

8. Har du brugt konceptet Self-Regulated Learning?

- Ja.  
 Nej.
- 

8.1 Hvorfor har du ikke brugt Self-Regulated Learning konceptet?

---

9. Fandt du konceptet med Self-Regulated Learning nyttigt?

1. Meget.  
 2.  
 3. Hverken, eller.  
 4.  
 5. Slet ikke.  
(Vælg dit svar på en skala fra 1 til 5, hvor 1 er "meget" og 5 er "slet ikke".)
-

---

10. Hvad har du fået ud af Self-Regulated Learning konceptet?

---

11. Har du set de videoer du fik udleveret på en USB stik?

- Jeg har set dem alle sammen.  
 Jeg har set nogle af dem.  
 Jeg har kun set enkelte.  
 Jeg har ikke set dem.

11.2 Har du fundet situationer/problemstillinger i videoerne som du har arbejdet videre med?

- Ja, en gang eller to.  
 Ja, flere gange.  
 Nej, der var ikke noget i videoerne jeg skulle arbejde videre med.

11.1 Hvorfor har du ikke set videoerne?

---

12. Har du diskuteret videoerne med en supervisor?

- Ja, flere af dem.  
 Ja, enkelte.  
 Ja, én.  
 Nej.

12.1 Har det hjulpet dig at tale med en supervisor om videoen/videoerne?

1. Meget.  
 2.  
 3. Hverken, eller.  
 4.  
 5. Slet ikke.  
(Vælg dit svar på en skala fra 1 til 5, hvor 1 er "meget" og 5 er "slet ikke".)

12.2 Hvorfor talte du ikke med din supervisor om videoerne?

---

13. Fandt du videoerne nyttige?

1. Meget.  
 2.  
 3. Hverken, eller.  
 4.  
 5. Slet ikke.  
(Vælg dit svar på en skala fra 1 til 5, hvor 1 er "meget" og 5 er "slet ikke".)

13.1 Hvorledes var videoerne nyttige for dig?

---

13.2 Hvorfor var videoerne ikke nyttige for dig?

---

14. Hvor tit har du besøgt hjemmesiden?

- Ofte.  
 En gang i mellem.  
 Sjældent.  
 Kun 1 gang.  
 Jeg har ikke brugt hjemmesiden.

---

14.1 Hvorfor har du ikke besøgt hjemmesiden?

---

---

15. Var indholdet på hjemmesiden relevant for dig?

1. Meget.  
 2.  
 3. Hverken, eller.  
 4.  
 5. Slet ikke.  
(Vælg dit svar på en skala fra 1 til 5, hvor 1 er "meget" og 5 er "slet ikke".)
- 

16. Hvordan har det været at deltage i dette studie?

---

Tak fordi du deltog i spørgeskemaundersøgelsen.

mvh  
Claudia Jaensch  
projektansvarlig læge  
mobil 42396503
