# Supplementary material for: Supporting self-regulated-learning in colonoscopy training—A comparison cohort trial
Source: PubMed Central journal article supplement — Heliyon. 2024 Mar 16;10(7):e28133. doi: 10.1016/j.heliyon.2024.e28133 (PMC10979054; doi:10.1016/j.heliyon.2024.e28133), 2024-03-16
Supplement: mmc2.pdf [file mmc2.pdf]

# anden email survey SRL i koloskopien

Kære projektdeltager

Vil du venligst udfylde denne anden (og sidste) spørgeskemaundersøgelse.

På forhånd tak

mvh

Claudia Jaensch

---

Velkommen til anden spørgeskemaundersøgelsen om projektet Self-Regulated Learning i koloskopien.

Tak fordi du har været med i projektet.

Tak fordi du tager dig tid til at besvare alle spørgsmålene. Det tager cirka 3 minutter.

---

1. Dato

\_\_\_\_\_ (Dato for udfyldelse af denne survey.)

---

2. Hvad er din fødselsdag?

\_\_\_\_\_

---

3. Hvor langt er du i uddannelsen?

- uklassificeret
  - intro-læge
  - HU-læge
  - speciallæge
  - andet
- 

3.1 Andet? Hvad?

\_\_\_\_\_

---

4. Hvor mange koloskopier har du lavet i alt indtil nu?

\_\_\_\_\_ (Tæl også alle undersøgelser med hvor du har lavet det meste selv og en supervisor har lavet mindre dele af undersøgelsen.)

---

5. På hvilket sygehus var du ansat da du startede i projektet?

- Viborg
  - Horsens
  - andet
- 

5.1 Hvor arbejdede du da du startede i projektet?

\_\_\_\_\_

---

6. Er du stadig ansat samme sted?

- Ja
  - Nej
- 

6.1 Hvor arbejder du nu?

\_\_\_\_\_

---

7. Hvordan har det været at deltage i dette studie?

\_\_\_\_\_

---

---

8. Har du ellers kommentarer?

---

Tak fordi du deltog i spørgeskemaundersøgelsen.

mvh  
Claudia Jaensch  
projektansvarlig læge  
mobil 42396503
