# Supplementary material for: Supporting self-regulated-learning in colonoscopy training—A comparison cohort trial
Source: PubMed Central journal article supplement — Heliyon. 2024 Mar 16;10(7):e28133. doi: 10.1016/j.heliyon.2024.e28133 (PMC10979054; doi:10.1016/j.heliyon.2024.e28133), 2024-03-16
Supplement: mmc3.pdf [file mmc3.pdf]

# Anden email survey - SRL i koloskopien

Kære projektdeltager

Vil du venligst udfylde den anden (og sidste) email survey i projektet Self-Regulated Learning i koloskopien.

På forhånd mange tak

mvh

Claudia Jaensch

---

lægenummer

---

Velkommen til anden spørgeskemaundersøgelsen om projektet Self-Regulated Learning i koloskopien.

Tak fordi du har været med i projektet.

Tak fordi du tager dig tid til at besvare alle spørgsmålene. Det tager circa 10 minutter.

---

1. Dato

\_\_\_\_\_

(Dato for udfyldelse af denne survey.)

---

2. Hvad er din fødselsdag?

---

---

3. Hvor langt er du i uddannelsen?

- uklassificeret
- introlæge
- HU-læge
- speciallæge
- andet

---

3.1 Andet? Hvad?

---

---

4. Hvor mange koloskopier har du lavet i alt indtil nu?

\_\_\_\_\_

(Tæl også alle undersøgelser med hvor du har lavet det meste selv og en supervisor har lavet mindre dele af undersøgelsen.)

---

5. På hvilket sygehus var du ansat da du startede i projektet?

- Herning
- Randers
- andet

---

5.1 Hvor arbejdede du da du startede i projektet?

---

---

6. Er du stadig ansat samme sted?

- Ja
- Nej

---

6.1 Hvor arbejder du nu?

---

---

En vigtig del i Self-Regulated Learning konceptet er de tre faser:

1. Planlægning
2. Gennemførelse
3. Eftertanker

For at bruge de tre faser optimalt, gør man sig nogle tanker i hver fase og konkluderer bagefter om alt gik som ventet, eller hvorfor det ikke gjorde. Det vil sige man laver en form for feedback til sig selv.

---

8. Har du brugt Self-Regulated Learning konceptet indenfor det sidste halve år?

- Ja, tit.  
 Ja, af og til.  
 Nej, ikke siden sidste spørgeskemaundersøgelse.  
 Ved ikke.

---

8.1 Hvorfor har du ikke brugt Self-Regulated Learning konceptet mere?

\_\_\_\_\_

---

8.2 Du "ved ikke" om du har brugt Self-Regulated Learning konceptet siden sidst? Kan du uddybe?

\_\_\_\_\_

---

9. Hjælper SRL dig til at blive bedre til koloskopi?

- Ja, bestemt.  
 Ja, lidt.  
 Nej.  
 Ved ikke.

---

10. Hvor tit har du besøgt hjemmesiden siden sidste spørgeskemaundersøgelse?

- Ofte.  
 En gang i mellem.  
 Sjældent.  
 Kun 1 gang.  
 Jeg har ikke brugt hjemmesiden igen.

---

11. Har du ellers kommentarer?

\_\_\_\_\_

---

antal login på hjemmesiden

\_\_\_\_\_

---

antal minutter på hjemmesiden

\_\_\_\_\_

---

Tak fordi du deltog i spørgeskemaundersøgelsen.

mvh  
Claudia Jaensch  
projektansvarlig læge  
mobil 42396503
